# Supplementary material for: Occupational Exposures, Chronic Obstructive Pulmonary Disease and Tomographic Findings in the Spanish Population
Source: MDPI journal article supplement (doi:10.3390/toxics12100689), 2024-09-24
Supplement: s1 [file s1]

Table S1: Most common reported occupations for the main exposure categories

| Agent                              | Level    | Number <sup>1</sup> | Most recorded occupations (ISCO-88 code) <sup>2</sup>                                                                                                                                                                                       |
|------------------------------------|----------|---------------------|---------------------------------------------------------------------------------------------------------------------------------------------------------------------------------------------------------------------------------------------|
| Vapours, gases, dust or fumes      | Low      | 428                 | Armed forces (110); nurses (2230); other health professionals (222); cooks (5122); personal care workers (513); hairdressers (5141); bricklayers and stonemasons (7122); tailors (7433); car, taxi and van drivers (8322); cleaners (9132). |
|                                    | High     | 161                 | Welders (7212); painters (7141); machine-tool setters and setter-operators (7223); heavy-truck and lorry drivers (8324); farm-hands and labourers (9211).                                                                                   |
| Pesticides                         | Low/High | 32                  | Field crop and vegetable growers (6111); dairy and livestock producers (6121); farm-hands and labourers (9211).                                                                                                                             |
| Solvents                           | Low      | 174                 | Medical doctors (2221); nurses (2230); personal care workers (513).                                                                                                                                                                         |
|                                    | High     | 48                  | Hairdressers (5141); painters (7141); machine-tool setters and setter-operators (7223); motor vehicle mechanics and fitters (7231).                                                                                                         |
| Metals                             | Low/High | 112                 | Physical and engineering science technicians (311); painters (7141); welders (7212); machine-tool setters and setter-operators (7223); assembling labourers (9321).                                                                         |
| No exposure<br>(none of the above) | -        | 503                 | Housewives (-); teachers (233); technical and commercial sales representatives (3415); administrative workers (3431); office clerks (41); shop salespersons and demonstrators (5220).                                                       |

<sup>1</sup> Total number of reported jobs that were classified by the JEM in this exposure category. In total, 1096 jobs were reported by the 526 study participants. Different exposures may overlap.

<sup>2</sup> An occupational description for all ISCO-88 codes can be found at <https://ilostat.ilo.org/methods/concepts-and-definitions/classification-occupation/>

Table S2. Respiratory symptoms according to exposure to vapours, gases, dusts and fumes and pesticides.

| Variable                             |            | None         | Low          | High         | p-value       |
|--------------------------------------|------------|--------------|--------------|--------------|---------------|
| <b>Vapours, gases, dust or fumes</b> |            |              |              |              |               |
| Chronic cough                        | Total      | 191 (100.0%) | 208 (100.0%) | 114 (100.0%) | 0.4659        |
|                                      | No         | 150 (78.5%)  | 169 (81.3%)  | 86 (75.4%)   |               |
|                                      | Yes        | 41 (21.5%)   | 39 (18.8%)   | 28 (24.6%)   |               |
|                                      | N missings | 5            | 3            | 2            |               |
| Chronic bronchitis                   | Total      | 177 (100.0%) | 199 (100.0%) | 110 (100.0%) | 0.0541        |
|                                      | No         | 163 (92.1%)  | 189 (95.0%)  | 96 (87.3%)   |               |
|                                      | Yes        | 14 (7.9%)    | 10 (5.0%)    | 14 (12.7%)   |               |
|                                      | N missings | 19           | 12           | 6            |               |
| Expectoration                        | Total      | 195 (100.0%) | 210 (100.0%) | 115 (100.0%) | 0.5022        |
|                                      | No         | 161 (82.6%)  | 175 (83.3%)  | 90 (78.3%)   |               |
|                                      | Yes        | 34 (17.4%)   | 35 (16.7%)   | 25 (21.7%)   |               |
|                                      | N missings | 1            | 1            | 1            |               |
| Dyspnea                              | Total      | 191 (100.0%) | 208 (100.0%) | 114 (100.0%) | 0.2140        |
|                                      | No         | 164 (85.9%)  | 173 (83.2%)  | 89 (78.1%)   |               |
|                                      | Yes        | 27 (14.1%)   | 35 (16.8%)   | 25 (21.9%)   |               |
|                                      | N missings | 5            | 3            | 2            |               |
| Wheezing                             | Total      | 196 (100.0%) | 210 (100.0%) | 116 (100.0%) | <b>0.0253</b> |
|                                      | No         | 127 (64.8%)  | 132 (62.9%)  | 58 (50.0%)   |               |
|                                      | Yes        | 69 (35.2%)   | 78 (37.1%)   | 58 (50.0%)   |               |
|                                      | N missings | 0            | 1            | 0            |               |

Table S2. Cont.

| Variable                      |            | None         | Low          | High         | p-value |
|-------------------------------|------------|--------------|--------------|--------------|---------|
| Vapours, gases, dust or fumes |            |              |              |              |         |
| Any symptom (ECCS)            | Total      | 190 (100.0%) | 209 (100.0%) | 112 (100.0%) | 0.2279  |
|                               | No         | 83 (43.7%)   | 95 (45.5%)   | 40 (35.7%)   |         |
|                               | Yes        | 107 (56.3%)  | 114 (54.5%)  | 72 (64.3%)   |         |
|                               | N missings | 6            | 2            | 4            |         |
| Variable                      |            | None         | Low          | High         | p-value |
| Pesticides                    |            |              |              |              |         |
| Chronic cough                 | Total      | 191 (100.0%) | 14 (100.0%)  | 18 (100.0%)  | 0.5818  |
|                               | No         | 150 (78.5%)  | 11 (78.6%)   | 16 (88.9%)   |         |
|                               | Yes        | 41 (21.5%)   | 3 (21.4%)    | 2 (11.1%)    |         |
|                               | N missings | 5            | 0            | 0            |         |
| Chronic bronchitis            | Total      | 177 (100.0%) | 14 (100.0%)  | 17 (100.0%)  | 0.6596  |
|                               | No         | 163 (92.1%)  | 12 (85.7%)   | 16 (94.1%)   |         |
|                               | Yes        | 14 (7.9%)    | 2 (14.3%)    | 1 (5.9%)     |         |
|                               | N missings | 19           | 0            | 1            |         |
| Expectoration                 | Total      | 195 (100.0%) | 14 (100.0%)  | 18 (100.0%)  | 0.8293  |
|                               | No         | 161 (82.6%)  | 12 (85.7%)   | 14 (77.8%)   |         |
|                               | Yes        | 34 (17.4%)   | 2 (14.3%)    | 4 (22.2%)    |         |
|                               | N missings | 1            | 0            | 0            |         |
| Dyspnea                       | Total      | 191 (100.0%) | 13 (100.0%)  | 17 (100.0%)  | 0.4435  |
|                               | No         | 164 (85.9%)  | 12 (92.3%)   | 13 (76.5%)   |         |
|                               | Yes        | 27 (14.1%)   | 1 (7.7%)     | 4 (23.5%)    |         |
|                               | N missings | 5            | 1            | 1            |         |
| Wheezing                      | Total      | 196 (100.0%) | 14 (100.0%)  | 18 (100.0%)  | 0.0157  |
|                               | No         | 127 (64.8%)  | 4 (28.6%)    | 9 (50.0%)    |         |
|                               | Yes        | 69 (35.2%)   | 10 (71.4%)   | 9 (50.0%)    |         |

Abbreviations: European Coal and Steel Community (ECCS) questionnaire on respiratory symptoms

Table S3. CT variables according to respiratory symptoms.

| Variable                                   |                 | No              | Yes             | p-value |
|--------------------------------------------|-----------------|-----------------|-----------------|---------|
| Expectoration                              |                 |                 |                 |         |
| % Total Emphysema Volume (Fixed Threshold) | Valid n         | 429             | 94              | 0.0135  |
|                                            | Mean( $\pm$ SD) | 6.01 (8.11)     | 8.49 (11.32)    |         |
| Percentil 15                               | Valid n         | 429             | 94              | 0.0465  |
|                                            | Mean( $\pm$ SD) | -918.79 (26.90) | -925.12 (31.78) |         |
| %Airway Wall area Primary Bronchi          | Valid n         | 429             | 94              | 0.7151  |
|                                            | Mean( $\pm$ SD) | 50.13 (5.78)    | 50.37 (6.04)    |         |
| %Airway Wall area Secondary Bronchi        | Valid n         | 429             | 93              | 0.7310  |
|                                            | Mean( $\pm$ SD) | 64.33 (8.04)    | 64.64 (6.86)    |         |
| Lumen area - Primary Bronchi               | Valid n         | 429             | 94              | 0.4502  |
|                                            | Mean( $\pm$ SD) | 38.72 (17.18)   | 40.31 (23.44)   |         |
| Lumen area - Secondary Bronchi             | Valid n         | 429             | 93              | 0.7864  |
|                                            | Mean( $\pm$ SD) | 12.23 (8.34)    | 12.49 (8.61)    |         |

Table S3. Cont.

| Variable                                      |            | No              | Yes             | p-value |
|-----------------------------------------------|------------|-----------------|-----------------|---------|
| Dyspnoea                                      |            |                 |                 |         |
| % Total Emphysema Volume<br>(Fixed Threshold) | Valid n    | 429             | 87              | 0.2811  |
|                                               | Mean(± SD) | 6.31 (8.39)     | 7.44 (10.86)    |         |
| Percentil 15                                  | Valid n    | 429             | 87              | 0.7027  |
|                                               | Mean(± SD) | -920.31 (27.00) | -919.06 (32.48) |         |
| %Airway Wall area Primary<br>Bronchi          | Valid n    | 429             | 87              | 0.0005  |
|                                               | Mean(± SD) | 49.83 (5.75)    | 52.21 (5.91)    |         |
| %Airway Wall area<br>Secondary Bronchi        | Valid n    | 429             | 86              | 0.0063  |
|                                               | Mean(± SD) | 64.01 (7.84)    | 66.54 (7.66)    |         |
| Lumen area - Primary<br>Bronchi               | Valid n    | 429             | 87              | 0.0016  |
|                                               | Mean(± SD) | 40.05 (18.92)   | 33.21 (15.22)   |         |
| Lumen area - Secondary<br>Bronchi             | Valid n    | 429             | 86              | 0.0461  |
|                                               | Mean(± SD) | 12.55 (8.60)    | 10.58 (6.88)    |         |
| Wheezing                                      |            |                 |                 |         |
| % Total Emphysema Volume<br>(Fixed Threshold) | Valid n    | 320             | 205             | 0.3512  |
|                                               | Mean(± SD) | 6.13 (8.34)     | 6.86 (9.48)     |         |
| Percentil 15                                  | Valid n    | 320             | 205             | 0.5662  |
|                                               | Mean(± SD) | -919.22 (27.65) | -920.65 (28.30) |         |
| %Airway Wall area Primary<br>Bronchi          | Valid n    | 320             | 205             | 0.0172  |
|                                               | Mean(± SD) | 49.73 (5.77)    | 50.98 (5.90)    |         |
| %Airway Wall area<br>Secondary Bronchi        | Valid n    | 320             | 204             | 0.0371  |
|                                               | Mean(± SD) | 63.80 (7.89)    | 65.26 (7.68)    |         |
| Lumen area - Primary<br>Bronchi               | Valid n    | 320             | 205             | 0.0514  |
|                                               | Mean(± SD) | 40.15 (18.82)   | 36.93 (17.71)   |         |
| Lumen area - Secondary<br>Bronchi             | Valid n    | 320             | 204             | 0.2243  |
|                                               | Mean(± SD) | 12.63 (8.41)    | 11.72 (8.28)    |         |

Mean and standard deviation (SD) of each variable is presented in each subgroup
